# Supplementary material for: Evaluation of Apple Pomace Flour Obtained Industrially by Dehydration as a Source of Biomolecules with Antioxidant, Antidiabetic and Antiobesity Effects
Source: PubMed Central journal article supplement (PMC7278621; doi:10.3390/antiox9050413), 2020-05-12
Supplement: antioxidants-09-00413-s001.pdf [file antioxidants-09-00413-s001.pdf]

**Table 1.** Retention Time, Parents Ion, Products Ions, Calibration Range, R2, LOD, LOQ for the Investigated Polyphenols.

| Compounds                     | Retention Time, min | Parent Ion, [M-H] <sup>-</sup> , m/z | Product Ions, [M-H] <sup>-</sup> , m/z (Collision Energy, eV) | Calibration Range, mg/L | R <sup>2</sup> | LOD, mg/L | LOQ, mg/L |
|-------------------------------|---------------------|--------------------------------------|---------------------------------------------------------------|-------------------------|----------------|-----------|-----------|
| Gallic-acid                   | 2.35                | 169.032                              | 125.04 (16); 79.11 (31)                                       | 0.010 - 2.000           | 0.9950         | 0.148     | 0.493     |
| Protocatechuic-acid           | 4.10                | 153.003                              | 108.07 (5); 109.10 (15)                                       | 0.050 - 2.000           | 0.9980         | 0.102     | 0.339     |
| Aesculin                      | 4.86                | 339.080                              | 133.09 (44); 177.06 (25)                                      | 0.008 - 1.800           | 0.9980         | 0.093     | 0.308     |
| <i>p</i> -Hydroxybenzoic-acid | 5.20                | 137.057                              | 93.19 (19); 108.33 (22)                                       | 0.110 - 2.200           | 0.9959         | 0.161     | 0.535     |
| 5-O-Caffeoylquinic-acid       | 5.31                | 353.103                              | 191.28 (25)                                                   | 0.011 - 2.100           | 0.9993         | 0.063     | 0.210     |
| Caffeic-acid                  | 5.64                | 179.004                              | 134.00 (13); 135.00 (16)                                      | 0.009 - 1.900           | 0.9927         | 0.182     | 0.606     |
| Rutin                         | 6.23                | 609.197                              | 299.98 (42); 301.20 (32)                                      | 0.012 - 2.400           | 0.9984         | 0.099     | 0.331     |
| <i>p</i> -Coumaric-acid       | 6.39                | 163.031                              | 93.12 (39); 119.09 (16)                                       | 0.010 - 2.000           | 0.9975         | 0.110     | 0.366     |
| Quercetin-3-O-galactoside     | 6.40                | 463.002                              | 271.01 (44); 300.02 (29)                                      | 0.010 - 1.000           | 0.9942         | 0.096     | 0.321     |
| Ellagic-acid                  | 6.57                | 300.980                              | 284.00 (32); 300.04 (30)                                      | 0.010 - 1.000           | 0.9938         | 0.110     | 0.367     |
| Naringin                      | 6.74                | 579.241                              | 151.42 (43); 217.36 (33)                                      | 0.010 - 2.000           | 0.9951         | 0.158     | 0.527     |
| Sinapic-acid                  | 6.75                | 223.082                              | 149.21 (36)                                                   | 0.010 - 1.500           | 0.9968         | 0.107     | 0.358     |
| Kaempferol-7-O-glucoside      | 6.83                | 447.008                              | 255.03 (43); 284.03 (29)                                      | 0.003 - 0.500           | 0.9931         | 0.047     | 0.156     |
| Isorhamnetin-3-O-rutinoside   | 6.86                | 622.827                              | 313.95 (17); 151.21 (27)                                      | 0.010 - 2.000           | 0.9974         | 0.058     | 0.193     |
| Apigenin-7-O-glucoside        | 6.92                | 431.004                              | 239.11 (53); 268.03 (36)                                      | 0.001 - 0.200           | 0.9969         | 0.007     | 0.023     |
| Taxifolin                     | 7.07                | 303.020                              | 151.01 (16)                                                   | 0.010 - 2.000           | 0.9967         | 0.057     | 0.189     |
| Quercetin-3-O-rhamnoside      | 7.15                | 447.316                              | 300.96 (20); 270.82 (38)                                      | 0.010 - 2.000           | 0.9964         | 0.068     | 0.228     |
| Ferulic-acid                  | 7.16                | 193.057                              | 134.00 (18); 178.00 (15)                                      | 0.010 - 2.000           | 0.9902         | 0.204     | 0.680     |
| Phlorizin                     | 7.47                | 435.149                              | 273.16 (20); 167.16 (34)                                      | 0.010 - 2.000           | 0.9958         | 0.039     | 0.130     |
| Resveratrol                   | 7.77                | 227.060                              | 143.18 (22); 185.04 (22)                                      | 0.010 - 2.000           | 0.9991         | 0.073     | 0.242     |
| Luteolin                      | 8.17                | 285.035                              | 133.05 (30); 150.95 (24)                                      | 0.025 - 1.000           | 0.9974         | 0.062     | 0.207     |
| Eriodictyol                   | 8.57                | 286.974                              | 150.93 (19); 149.00 (24)                                      | 0.010 - 2.000           | 0.9962         | 0.098     | 0.325     |
| Phloretin                     | 8.75                | 273.066                              | 123.26 (26); 167.20                                           | 0.010 -                 | 0.997          | 0.116     | 0.387     |

|                      |       |         |                             |                  |            |       |       |
|----------------------|-------|---------|-----------------------------|------------------|------------|-------|-------|
|                      |       |         | (19)                        | 2.000            | 3          |       |       |
| <b>Quercetin</b>     | 8.90  | 301.026 | 151.01 (22); 179.00<br>(20) | 0.010 -<br>2.000 | 0.991<br>1 | 0.107 | 0.358 |
| <b>Apigenin</b>      | 8.92  | 269.032 | 117.24 (43); 135.02<br>(22) | 0.010 -<br>2.000 | 0.996<br>9 | 0.095 | 0.317 |
| <b>Naringenin</b>    | 8.92  | 271.036 | 119.10 (25); 151.07<br>(19) | 0.012 -<br>2.400 | 0.997<br>1 | 0.138 | 0.459 |
| <b>Kaempferol</b>    | 9.02  | 285.074 | 211.00 (32); 227.00<br>(32) | 0.025 -<br>2.000 | 0.991<br>3 | 0.252 | 0.841 |
| <b>Pterostilbene</b> | 9.22  | 255.026 | 196.70 (36)                 | 0.010 -<br>2.000 | 0.996<br>8 | 0.148 | 0.493 |
| <b>Isorhamnetin</b>  | 10.06 | 314.989 | 270.55 (37); 107.00<br>(34) | 0.010 -<br>2.000 | 0.998<br>5 | 0.106 | 0.354 |
| <b>Chrysin</b>       | 10.72 | 253.054 | 119.00 (36); 143.00<br>(30) | 0.010 -<br>2.000 | 0.997<br>8 | 0.052 | 0.175 |
| <b>Pinocembrin</b>   | 11.75 | 255.081 | 213.04 (25); 150.93<br>(25) | 0.010 -<br>2.000 | 0.994<br>7 | 0.077 | 0.256 |

---
